# Supplementary material for: Y Chromosome Genes May Play Roles in Directed Differentiation of Human Embryonic Stem Cells.
Source: Research Square preprint supplement (doi:10.21203/rs.3.rs-367003/v1), 2021-04-01
Supplement: Supplementary file 2 [file da43e1fc03cd306ab7d58336.pdf]

## **Y chromosome genes may play roles in directed differentiation of human embryonic stem cells.**

Farzaneh Khani <sup>a, b</sup>, Simin Nafian Dehkordi <sup>a, b</sup>, Sepideh Mollamohammadi <sup>c</sup>, Shiva Nemati <sup>b</sup>, Bahare Shokoohian <sup>b</sup>, Mehdi Alikhani <sup>b</sup>, Seyedeh Nafiseh Hassani <sup>c</sup>, Hossein Baharvand <sup>c, d</sup>, Hamid Reza Soleimanpour-lichaei <sup>a\*</sup>, Ghasem Hosseini Salekdeh <sup>b, e\*</sup>

<sup>a</sup> Department of Stem Cell and Regenerative Medicine, Institute of Medical Biotechnology, National Institute of Genetic Engineering & Biotechnology (NIGEB), 14965-161 Tehran, Iran

<sup>b</sup> Department of Molecular Systems Biology, Cell Science Research Center, Royan Institute for Stem Cell Biology and Technology, ACECR, 16656-59911 Tehran, Iran

<sup>c</sup> Department of Stem Cells and Developmental Biology, Cell Science Research Center, Royan Institute for Stem Cell Biology and Technology, ACECR, 16656-59911 Tehran, Iran

<sup>d</sup> Department of Developmental Biology, University of Science and Culture, 13145-871 Tehran, Iran

<sup>e</sup> Department of Molecular Sciences, Macquarie University, Sydney, NSW, Australia

### *\* Corresponding Authors*

Hamid Reza Soleimanpour lichaei, Department of Stem Cell and Regenerative Medicine, Institute of Medical Biotechnology, National Institute of Genetic Engineering & Biotechnology (NIGEB), Tehran, P.O.Box: 14965-161, Iran; Email: hrs@nigeb.ac.ir.

Ghasem Hosseini Salekdeh, Department of Molecular Systems Biology, Cell Science Research Center, Royan Institute for Stem Cell Biology and Technology, ACECR, Tehran 16635-148, Iran. Tel: +98 21 23562512. Email: [hsalekdeh@gmail.com](mailto:hsalekdeh@gmail.com); salekdeh@royaninstitute.org

**Original Images of western blots and other electrophoretic results**

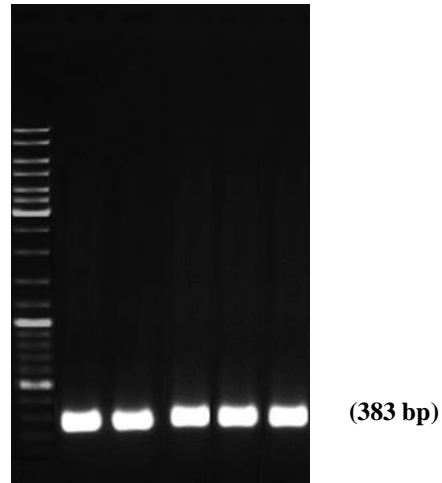

**Fig 2. A)** Gel electrophoresis by PCR product. *HSFY1*, *RBMY1A1*, *RPS4Y1* and *SRY* over-expressing Cell lines.

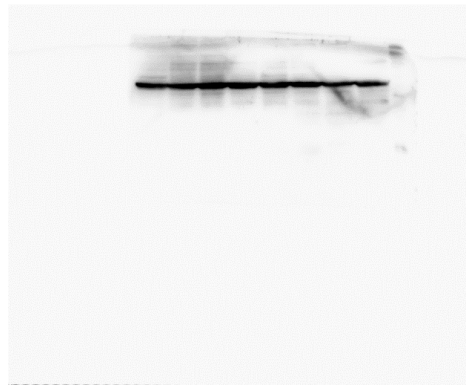

**Fig2. D)** Beta Actin

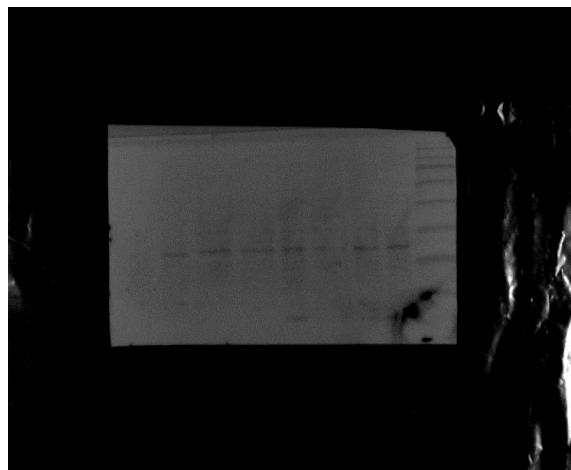

**Fig.2 D)** SRY Protein (25 KD)

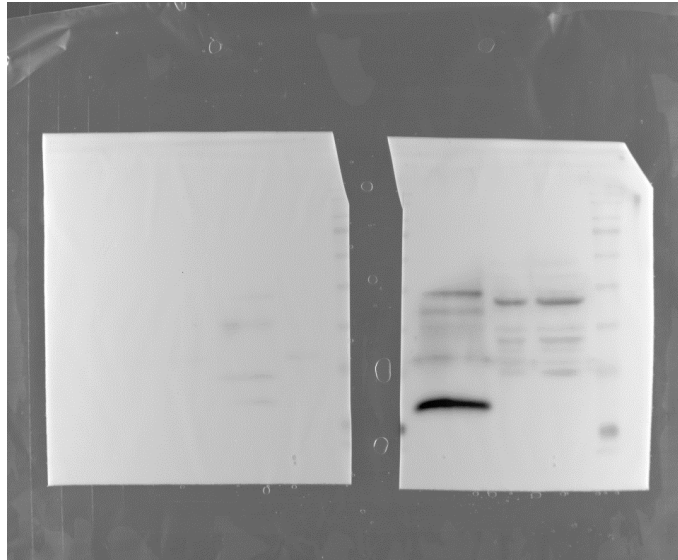

**Fig.2 D) SRY(Left/25KD), HSFY1(Right/43KD)**

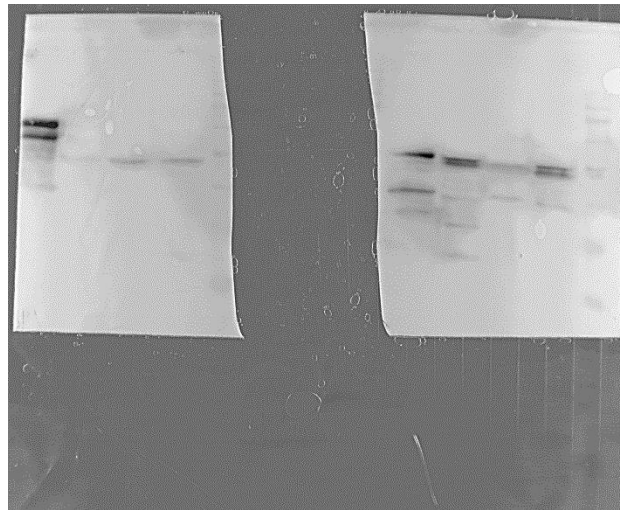

**Fig.2 D) RBMY1 (Left/55KD), HSFY1(Right/43KD)**

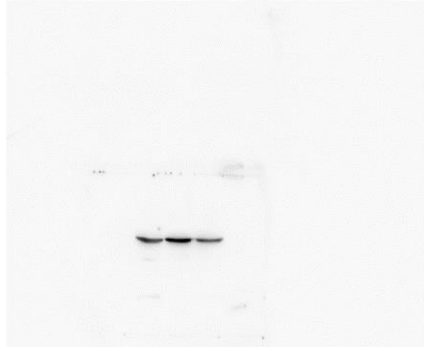

**Fig.2 D) RBMY1(55KD)**

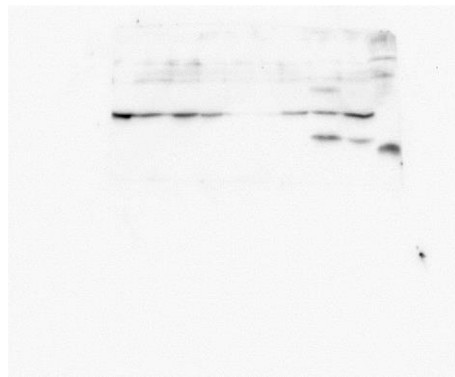

**Fig.3 E) RPS4Y1(29 KD)**
